# Supplementary material
Source: PubMed Central journal article supplement (PMC2950064)

**A**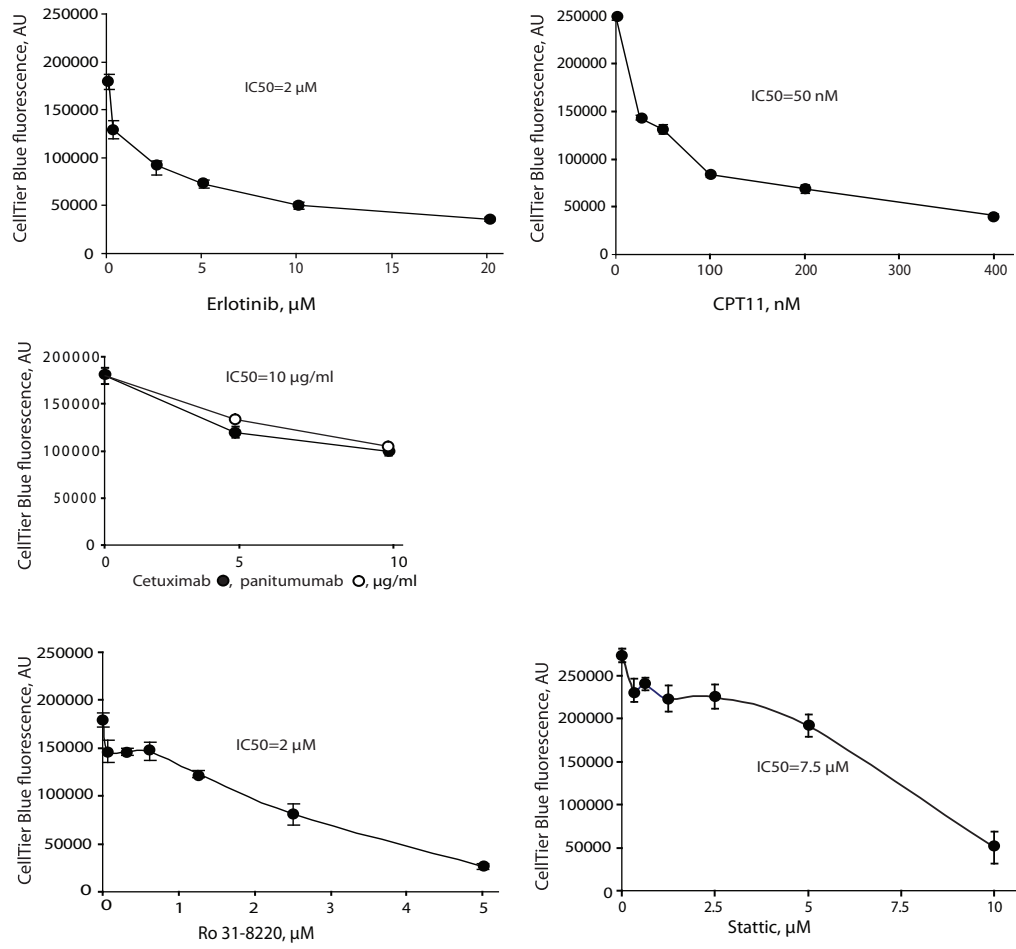**B**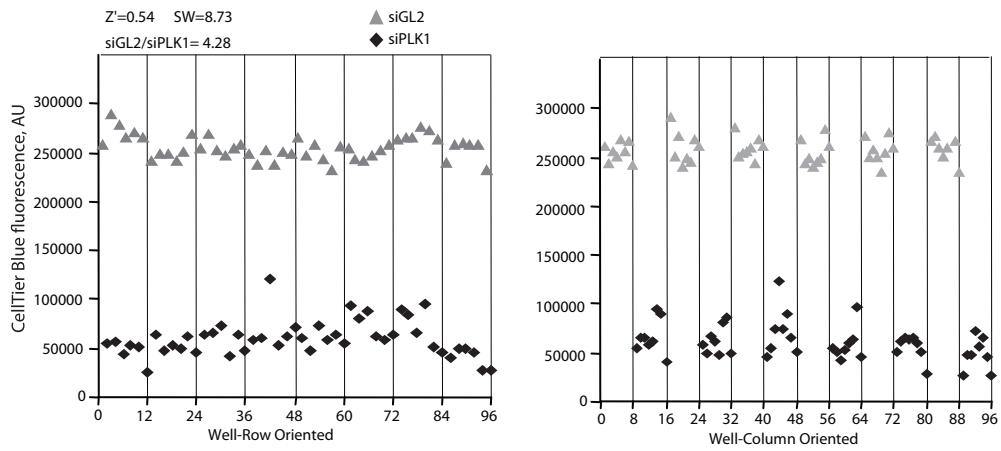**Figure S1, Astsaturov et al.**

Supplement: NIHMS235863-supplement-Supplemental_FIG__1.pdf [file NIHMS235863-supplement-Supplemental_FIG__1.pdf]

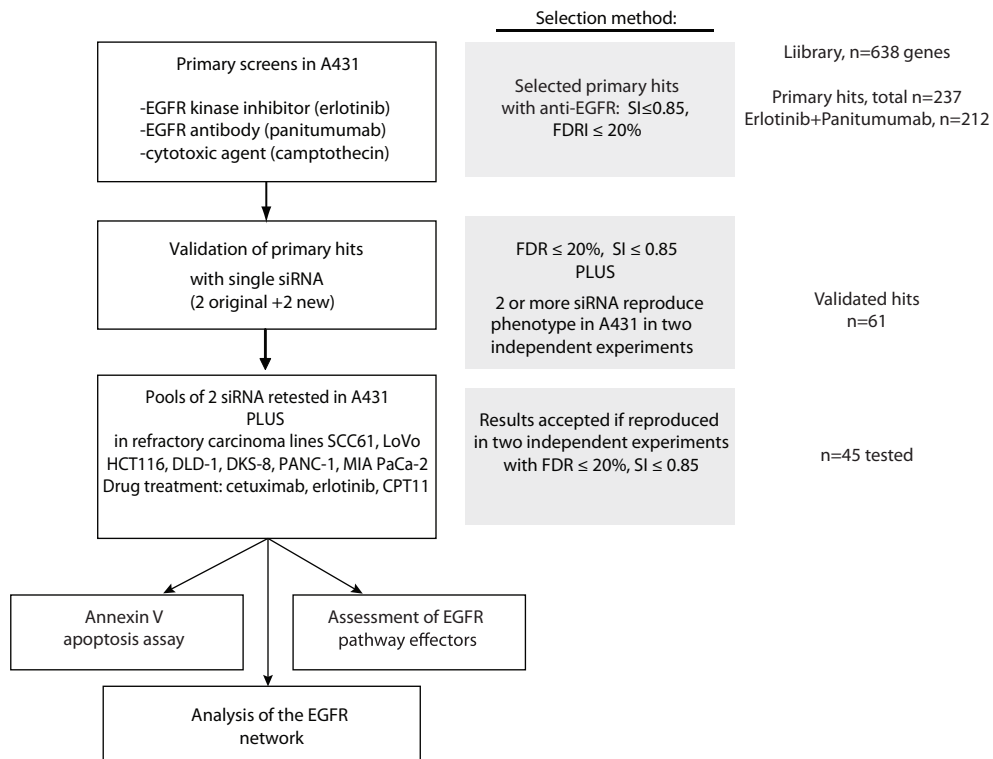

**Figure S2, Astsaturon et al.**

Supplement: NIHMS235863-supplement-Supplemental_FIG__2.pdf [file NIHMS235863-supplement-Supplemental_FIG__2.pdf]

**A**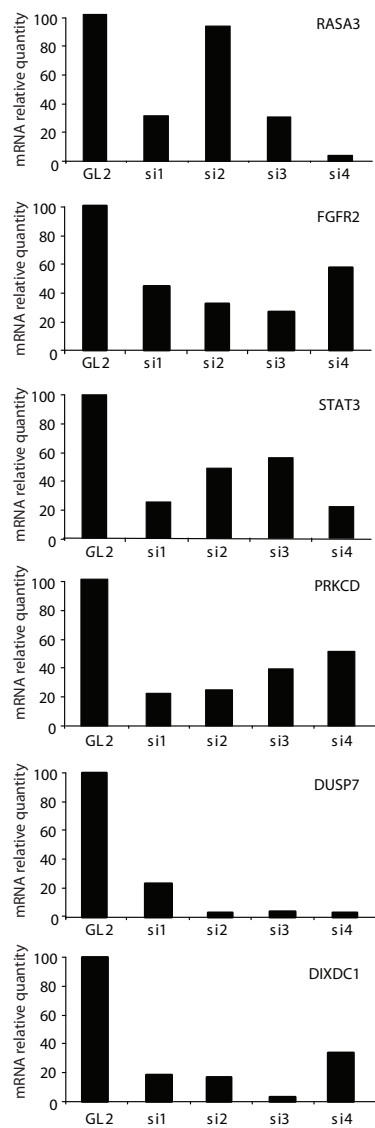**B**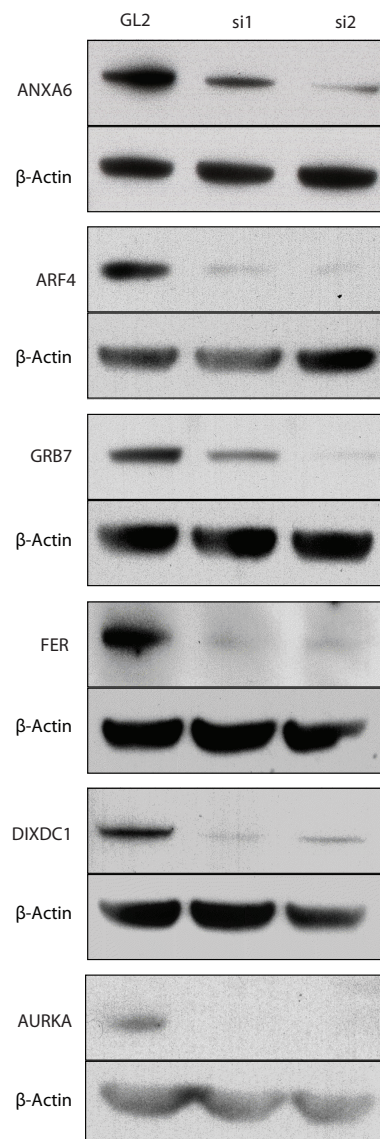

Figure S3, Astsaturon et al.

Supplement: NIHMS235863-supplement-Supplemental_FIG__3.pdf [file NIHMS235863-supplement-Supplemental_FIG__3.pdf]

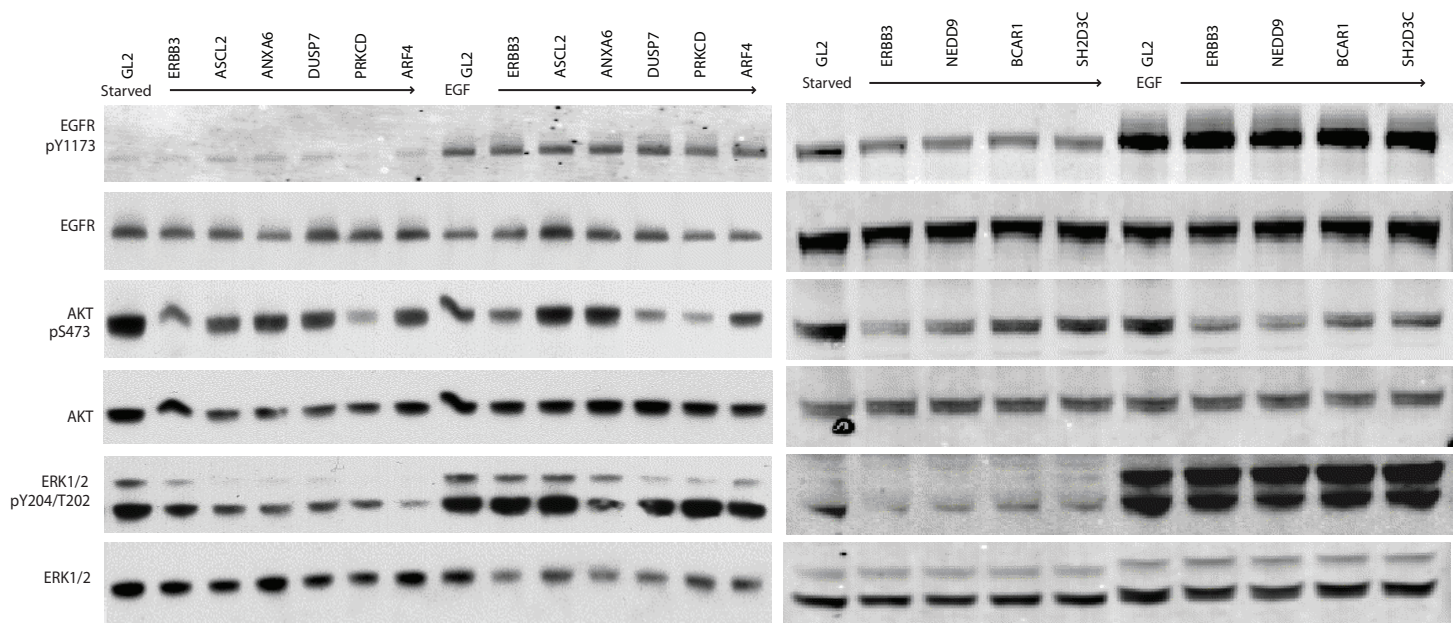

Figure S4, Astsaturon et al.

Supplement: NIHMS235863-supplement-Supplemental_FIG__4.pdf [file NIHMS235863-supplement-Supplemental_FIG__4.pdf]

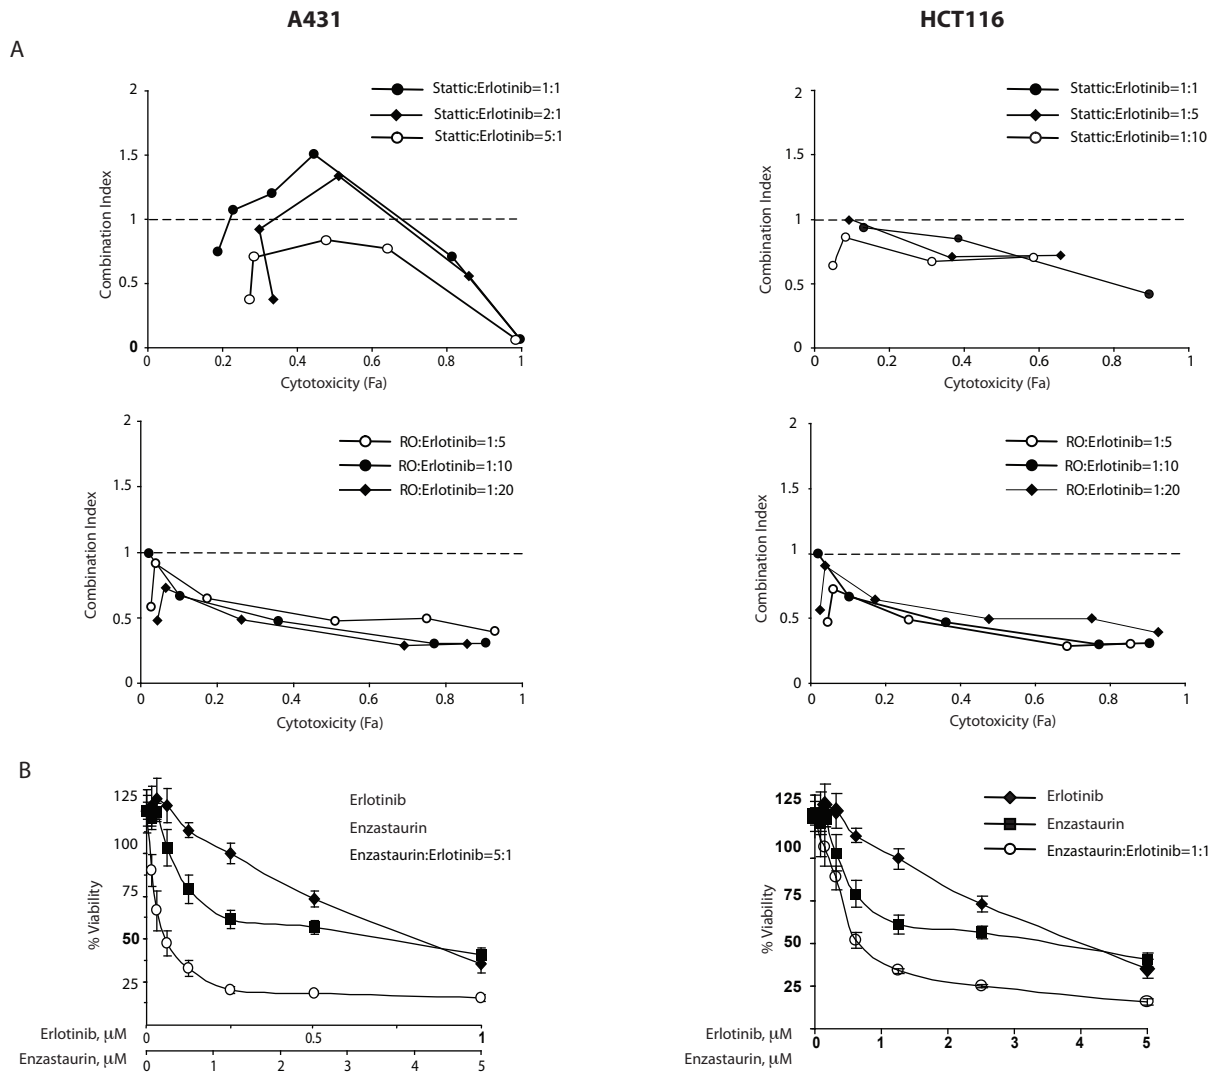

Figure S5, Astsaturov et al.

Supplement: NIHMS235863-supplement-Supplemental_FIG__5.pdf [file NIHMS235863-supplement-Supplemental_FIG__5.pdf]

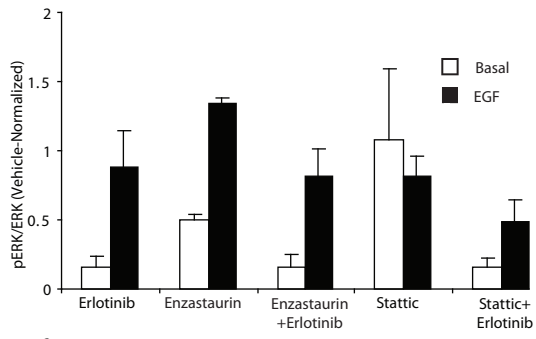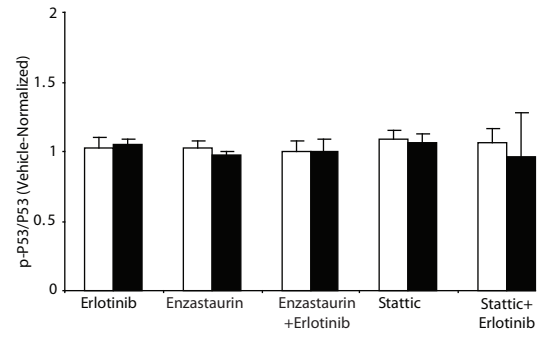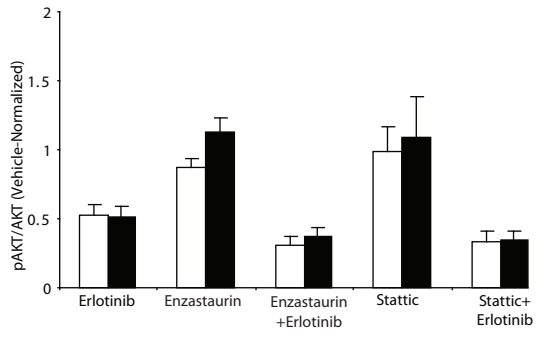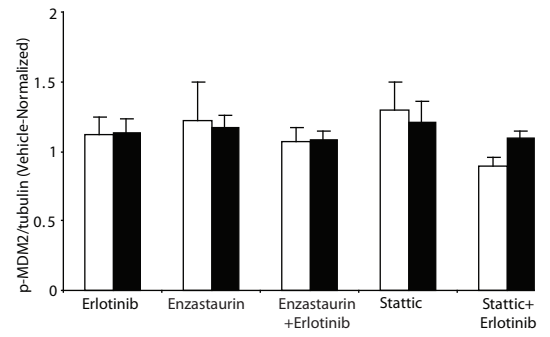

Figure S6, Astsaturou et al.

Supplement: NIHMS235863-supplement-Supplemental_FIG__6.pdf [file NIHMS235863-supplement-Supplemental_FIG__6.pdf]

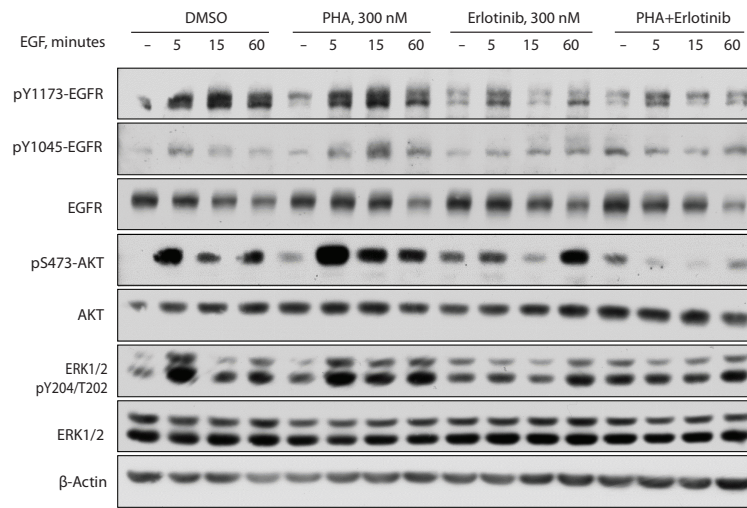

**Figure S7, Astsaturov et al.**

Supplement: NIHMS235863-supplement-Supplemental_FIG__7.pdf [file NIHMS235863-supplement-Supplemental_FIG__7.pdf]

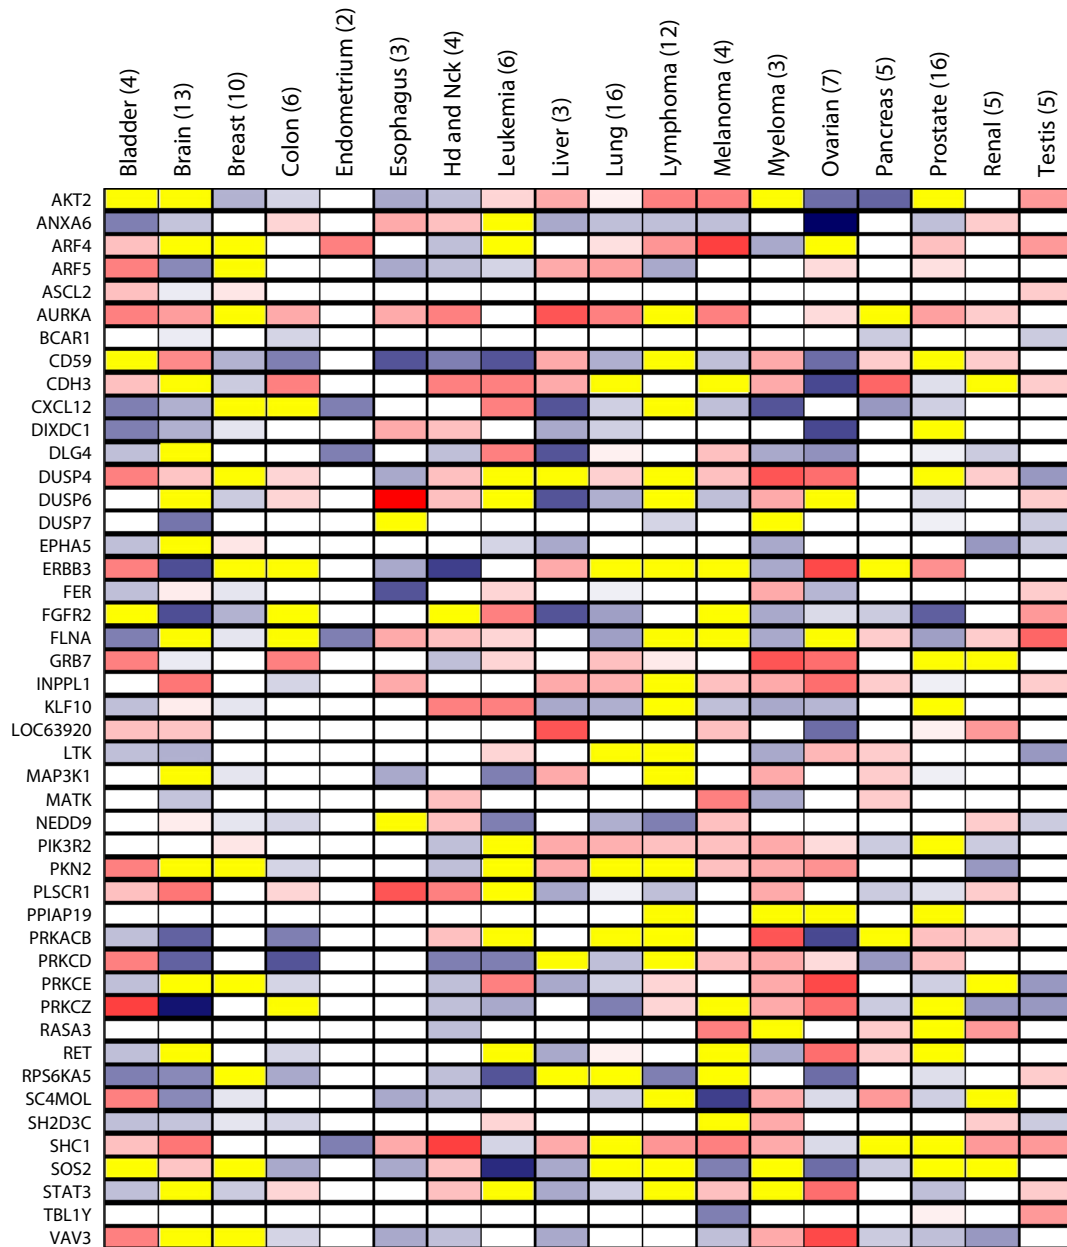

Figure S9, Astsaturov et al.

Supplement: NIHMS235863-supplement-Supplemental_FIG__8.pdf [file NIHMS235863-supplement-Supplemental_FIG__8.pdf]



Figure S9, Astsaturov et al.

Supplement: NIHMS235863-supplement-Supplemental_FIG__9.pdf [file NIHMS235863-supplement-Supplemental_FIG__9.pdf]
